# Supplementary material
Source: PubMed Central journal article supplement (PMC2753181)
Supplement: NIHMS141023-supplement-01.pdf [file NIHMS141023-supplement-01.pdf]

## Supplemental Information

for Jakubek et al., "Neuronal voltage-gated calcium ion channels are inhibited by trace yttrium released from carbon nanotubes"

### Whole Cell Patch Clamp Technique

The whole cell patch recording method is used to measure currents from small cells while maintaining constant voltage (voltage-clamp). In this method inward calcium currents are activated by test voltages applied at values between -60 mV and +60 mV from a holding potential of -100 mV. Characteristic time-dependent changes in current are exemplified by current traces shown in Fig. 1c. The maximum current vs. test voltage relationship is U-shaped (Fig. 1e). Inward current increases with stronger test depolarization because of the steep dependence of channel open probability on voltage. However, the concomitant decrease in driving force on calcium ions with depolarization acts to decrease current flow through each individual channel. The inward current is eventually balanced by an equal and opposite outward current at the channel reversal potential of close to +60 mV (Fig 1e ).

### Analysis of competitive metal binding to CNT-carboxylate functional groups

The metal adsorption isotherms in Fig. 4e were used to determine equilibrium constants for soluble yttrium binding to CNT-carboxylate, both in DI water and in saline where Na<sup>+</sup> ions compete for the same sites. The relevant reaction and binding equilibrium constant are:

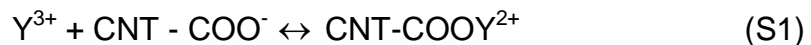

$$K_Y = \frac{[\text{CNT} - \text{COOY}^{2+}]}{[\text{CNT} - \text{COO}^-][Y^{3+}]} = \frac{N_Y}{(N_{\text{max}} - N_Y)[Y^{3+}]} \quad (\text{S2})$$

where  $N_Y$  is the number of bound sites,  $N_{\text{max}}$  is the total number of surface carboxylic sites, and  $[Y^{3+}]$  represents here the total concentration of all soluble yttrium species at equilibrium. Relation S2 fits the experimental isotherm of Fig. 4f well giving  $N_{\text{max}}=0.37$  mmol/g and  $K_Y = 857$  l/mmol. Expressed as a

1  
2  
3  
4 dissociation constant:  $K_d = 1/K_Y = 1.2 \mu\text{M}$ , which is the soluble yttrium  
5 concentration at which 50% of the available carboxylic sites will be occupied.  
6 From Figure 2d, yttrium mobilization into the electrophysiology buffer achieves  
7 higher concentrations than 1.2  $\mu\text{M}$ , indicating that CNT-surface-bound  $\text{Y}^{3+}$  is  
8 likely another source of bioavailable Y (beyond the discrete nanoparticles), and  
9 may explain why whole SWNT suspension has a slightly stronger calcium ion  
10 channel inhibitory effect than the supernatant alone (where the CNT-surface-  
11 bound yttrium is absent).  
12  
13  
14  
15  
16  
17  
18  
19  
20

21 In physiological solutions yttrium must compete with other ions for carboxylate  
22 binding sites on nanotubes and in the selectivity filter in the ion channel pore.  
23 Here simple experiments were conducted in saline solution to probe the  
24 competitive binding of yttrium and sodium on CNT-carboxylates. Figure 4e  
25 shows that total yttrium binding from 80  $\mu\text{M}$  solutions is reduced but still  
26 significant in the presence of 154 mM  $\text{Na}^+$ , allowing a quantitative analysis of  
27 competitive binding. In Y-doped saline two equilibrium expressions must be  
28 satisfied simultaneously:  
29  
30  
31  
32  
33  
34

$$35 \quad K_Y = \frac{[\text{CNT} - \text{COOY}^{2+}]}{[\text{CNT} - \text{COO}^-][\text{Y}^{3+}]} = \frac{N_Y}{(N_{\text{max}} - N_{\text{Na}} - N_Y)[\text{Y}^{3+}]} \quad (\text{S3})$$

$$36 \quad K_{\text{Na}} = \frac{[\text{CNT} - \text{COOY}^{2+}]}{[\text{CNT} - \text{COO}^-][\text{Na}^+]} = \frac{N_{\text{Na}}}{(N_{\text{max}} - N_{\text{Na}} - N_Y)[\text{Na}^+]} \quad (\text{S4})$$

37  
38  
39  
40  
41  
42  
43  
44 Where  $K_Y$ ,  $N_{\text{max}}$  were determined previously (857 l/mmol and 0.37 mmol/g  
45 respectively). At 154 mM,  $[\text{Na}^+]$  is nearly constant since it is much higher than the  
46 initial (maximum) yttrium concentration ( $\sim 0.1 \text{ mM}$ ). This leaves  $K_{\text{Na}}$  as the only  
47 unknown variable. Fitting the data in Fig. 4e yields  $K_{\text{Na}} = 0.11 \text{ l/mmol}$ , or a  
48 sodium dissociation constant  $K_d$  of 9060  $\mu\text{M}$  and provides a satisfactory curve  
49 shape (see Figure 4e bottom line). Clearly yttrium binding continues in the  
50 presence of the abundant  $\text{Na}^+$  ion, but is reduced from the pure water case by  
51 ion-ion competition.  
52  
53  
54  
55  
56  
57  
58  
59  
60  
61  
62  
63  
64  
65

1  
2  
3  
4  
5  
6  
7  
8  
9  
10  
11  
12  
13  
14  
15  
16  
17  
18  
19  
20  
21  
22  
23  
24  
25  
26  
27  
28  
29  
30  
31  
32  
33  
34  
35  
36  
37  
38  
39  
40  
41  
42  
43  
44  
45  
46  
47  
48  
49  
50  
51  
52  
53  
54  
55  
56  
57  
58  
59  
60  
61  
62  
63  
64  
65

Our reported dissociation constants ( $K_d = 1.2 \mu\text{M}$  for yttrium/SWNT-COO<sup>-</sup>) can be compared to the reciprocal binding constants for  $\text{Y}^{3+}$  and  $\text{Y}(\text{OH})^{2+}$  reported by Turkel *et al.* in experiments on salicylic acid, which range from 0.1 to 1000  $\mu\text{M}$  depending on the soluble yttrium species[29,34]. The metal speciation diagram for yttrium indicates  $\text{Y}^{3+}$  and  $\text{Y}(\text{OH})^{2+}$  under the neutral pH conditions of the CES buffer[35]

References

- [1] Seidlits SK, Lee JY, Schmidt CE. Nanostructured scaffolds for neural applications. *Nanomedicine* 2008;3(2):183-99.
- [2] Mattson MP, Haddon RC, Rao AM. Molecular Functionalization of Carbon Nanotubes and Use as Substrates for Neuronal Growth. *Journal of Molecular Neuroscience* 2000;14:175-82.
- [3] Hu H, Ni Y, Montana V, Haddon RC, Parpura V. Chemically Functionalized Carbon Nanotubes as Substrates for Neuronal Growth. *Nano Letters* 2004;4(3):507-11.
- [4] Ni Y, Hu H, Malarkey EB, Zhao B, Montana V, Haddon RC, et al. Chemically Functionalized Water Soluble Single-Walled Carbon Nanotubes Modulate Neurite Outgrowth. *Journal of Nanoscience and Nanotechnology* 2005;5:1707-12.
- [5] Lovat V, Pantarotto D, Lagostena L, Cacciari B, Grandolfo M, Righi M, et al. Carbon Nanotube Substrates Boost Neuronal Electrical Signaling. *Nano Letters* 2005;5(6):1107-10.
- [6] Mazzatenta A, Giugliano M, Campidelli S, Gambazzi L, Businaro L, Markram H, et al. Interfacing Neurons with Carbon Nanotubes: Electrical Signal Transfer and Synaptic Stimulation in Cultured Brain Circuits. *Journal of Neuroscience* 2008;27(26):6931-6.
- [7] Cellot G, Cilia E, Cipollone S, Rancic V, Sucapane A, Giordani S, et al. Carbon Nanotubes might improve neuronal performance by favouring electrical shortcuts. *Nature Nanotechnology* 2008;4:126-33.
- [8] Schrlau MG, Falls EM, Ziober BL, Bau HH. Carbon nanopipettes for cell probes and intracellular injection. *Nanotechnology* 2008;19(015101):1-4.
- [9] Keefer EW, Botterman BR, Romero MI, Rossi AF, Gross GW. Carbon nanotube coating improves neuronal recordings. *Nature Nanotechnology* 2008;3:434-9.
- [10] Hochberg LR, Serruya MD, Friehs GM, Mukand JA, Saleh M, Caplan AH, et al. Neuronal ensemble control of prosthetic devices by a human with tetraplegia. *Nature* 2006;442:164-71.
- [11] Malarkey EB, Reyes RC, Zhao B, Haddon RC, Parpura V. Water Soluble Single-walled Carbon Nanotubes Inhibit Stimulated Endocytosis in Neurons. *Nano Letters* 2008;8(10):3538-42.

- 1  
2  
3  
4 [12] Park KH, Chhowalla M, Iqbal Z, Sesti F. Single-walled Carbon Nanotubes  
5 are a New Class of Ion Channel Blockers. *Journal of Biological Chemistry*  
6 2003;278(50):50212-6.  
7  
8  
9 [13] Lin Z, Haus S, Edgerton J, Lipscombe D. Identification of Functionally  
10 Distinct Isoforms of the N-Type Ca<sup>2+</sup> Channel in Rat Sympathetic  
11 Ganglia and Brain. *Neuron* 1997;18(1):153-66.  
12  
13 [14] Lin Y, McDonough SI, Lipscombe D. Alternative Splicing in the Voltage-  
14 Sensing Region of N-Type Cav2.2 Channels Modulates Channel Kinetics.  
15 *Journal of Neurophysiology* 2004;92:2820-30.  
16  
17 [15] Thaler C, Gray AC, Lipscombe D. Cumulative inactivation of N-type  
18 Cav2.2 calcium channels modified by alternative splicing. *Proceedings of*  
19 *the National Academy of Sciences* 2004;101(15):5675-9.  
20  
21 [16] Liu X, Gurel V, Morris D, Murray DW, Zhitkovich A, Kane AB, et al.  
22 Bioavailability of Nickel in Single-Wall Carbon Nanotubes. *Advanced*  
23 *Materials* 2007;(19):2790-6.  
24  
25 [17] Catterall WA, Few AP. Calcium channel regulation and presynaptic  
26 plasticity. *Neuron* 2008;59(6):882-901.  
27  
28 [18] Raingo J, Castiglioni AJ, Lipscombe D. Alternative splicing controls G  
29 protein-dependent inhibition of N-type calcium channels in nociceptors.  
30 *Nature Neuroscience* 2007;10(3):285-92.  
31  
32 [19] Yan A, Xiao X, Külaots I, Sheldon BW, Hurt RH. Controlling water contact  
33 angle on carbon surfaces from 5° to 167°. *Carbon* 2006;44:3113-48.  
34  
35 [20] Guo L, Von Dem Bussche A, Beuchner M, Yan A, Kane AB, Hurt RH.  
36 Adsorption of essential micronutrients by carbon nanotubes and the  
37 implications for nanotoxicity testing. *Small* 2008;4(6):721-7.  
38  
39 [21] Worle-Knirsch JM, Pulskamp K, Krug HF. Oops They Did It Again! Carbon  
40 Nanotubes Hoax Scientists in Viability Assays. *Nano Letters*  
41 2006;6(6):1261-8.  
42  
43 [22] Kagan VE, Tyurina YY, Tyurin VA, Konduru NV, Potapovich AI, Osipov  
44 AN, et al. Direct and indirect effects of single walled carbon nanotubes on  
45 RAW 264.7 macrophages: Role of iron. *Toxicology Letters* 2006;165:88-  
46 100.  
47  
48 [23] Pulskamp K, Diabaté S, Krug HF. Carbon Nanotubes show no sign of  
49 acute toxicity but induce intracellular reactive oxygen species in  
50 dependence on contaminants. *Toxicology Letters* 2007;168:58-74.  
51  
52  
53  
54  
55  
56  
57  
58  
59  
60  
61  
62  
63  
64  
65

- 1  
2  
3  
4 [24] Liu X, Guo L, Morris D, Kane AB, Hurt RH. Targeted Removal of  
5 Bioavailable Metal as a Detoxification Strategy for Carbon Nanotubes.  
6 Carbon 2008;43(3):489-500.  
7  
8  
9 [25] Mlinar B, Enyeart JJ. Block of current through T-type calcium channels by  
10 trivalent metal cations and nickel in neural rat and human cells. Journal of  
11 Physiology 1992;(469):639-52.  
12  
13  
14 [26] Nachshen DA. Selectivity of the Ca Binding Site in Synaptosome Ca  
15 Channels. Journal of General Physiology 1984;83:941-67.  
16  
17 [27] Beedle AM, Zamponi G. Inhibition of Transiently Expressed Low- and  
18 High- Voltage-Activated Calcium Channels by Trivalent Metal Cations.  
19 Journal of Membrane Biology 2002;(187):225-38.  
20  
21  
22 [28] Sather WA, McCleskey EW. Permeation and Selectivity in Calcium  
23 Channels. Annual Review of Physiology 2003;65:133-59.  
24  
25  
26 [29] Horovitz CT. Biochemistry of Scandium and Yttrium, Part 1: physical and  
27 chemical fundamentals. New York: Kluwer Academic/Plenum Publisher;  
28 1999.  
29  
30 [30] Oberdörster G, Oberdörster E, Oberdörster J. Nanotoxicology: An  
31 Emerging Discipline Evolving from Studies of Ultrafine Particles.  
32 Environmental Health Perspectives 2005;113(7):823-39.  
33  
34  
35 [31] Plata DL, Gschwend PM, Reddy CM. Industrially synthesized single-  
36 walled carbon nanotubes: compositional data for users, environmental risk  
37 assessments, and source apportionment. Nanotechnology 2008;19:1-13.  
38  
39  
40 [32] Dunlop J, Bowlby M, Peri R, Vasilyev D, Arias R. High-throughput  
41 electrophysiology: an emerging paradigm for ion channel screening and  
42 physiology. Nature Reviews Drug Discovery 2008;7:358-68.  
43  
44  
45 [33] Guo L, Morris DG, Liu X, Vaslet C, Hurt RH, Kane AB. Iron Bioavailability  
46 and Redox Activity in Diverse Carbon Nanotube Samples. Chemistry of  
47 Materials 2007;19(14):3472-8.  
48  
49  
50 [34] Turkel N, Aydin R, Ozer U. Stability of complexes of scandium (III) and  
51 yttrium (III) with salicylic acid. Turkish Journal of Chemistry 1999;23:249-  
52 56.  
53  
54 [35] Johnson DJ, Amm DT, Laureson T, Gupta SK. Monolayers and Langmuir-  
55 Blodgett films of yttrium stearate. Thin Solid Films 1998;326:223-6.  
56  
57  
58  
59  
60  
61  
62  
63  
64  
65
